# Supplementary material for: Implications of ABCC4–Mediated cAMP Efflux for CRC Migration
Source: MDPI journal article supplement (doi:10.3390/cancers12123547), 2020-11-27
Supplement: s1 [file s1]

# Supplementary Materials: Implications of ABCC4-Mediated cAMP Eflux for CRC Migration

Jakub Kryczka, Ewelina Sochacka, Izabela Papiewska-Pająk and Joanna Boncela

**A**

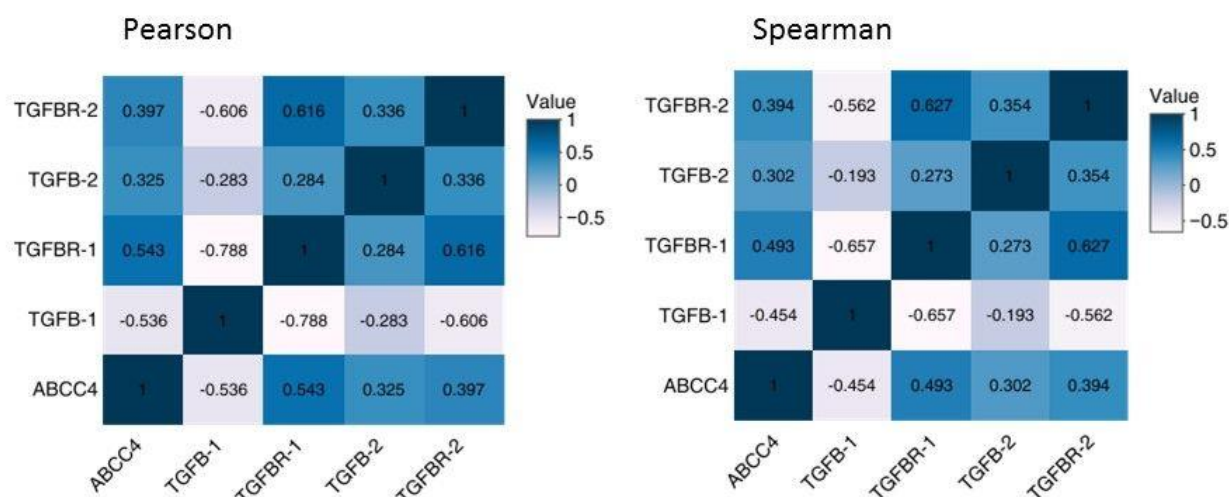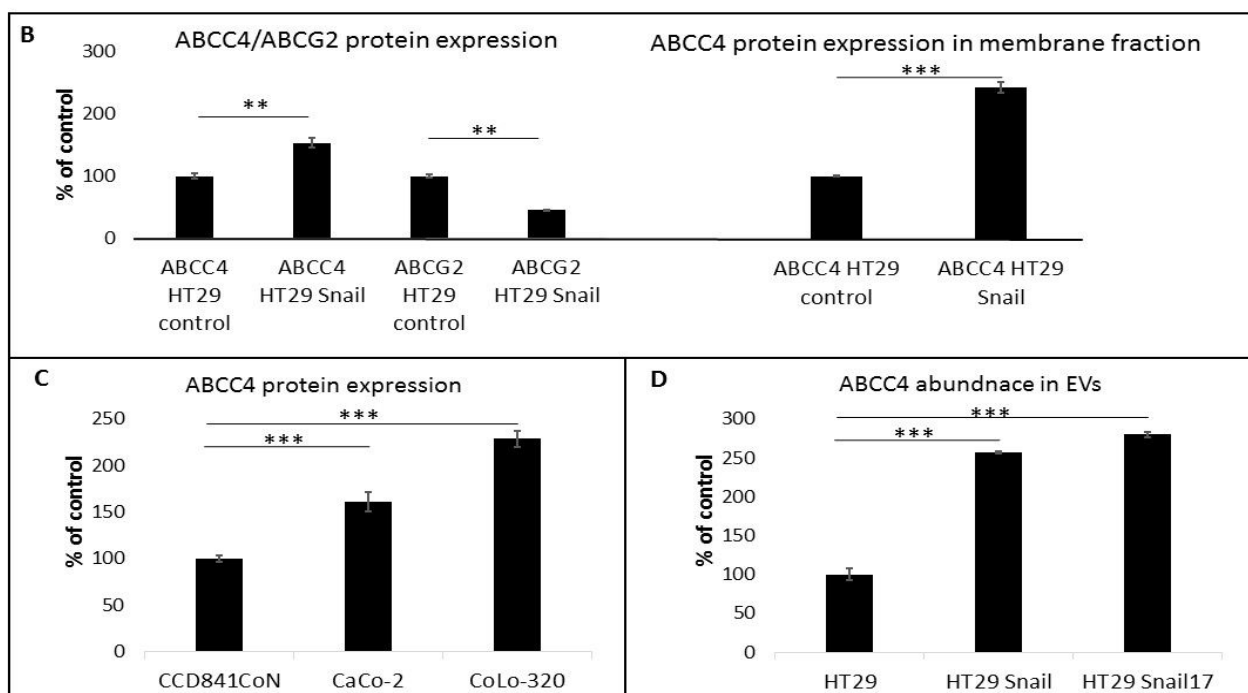

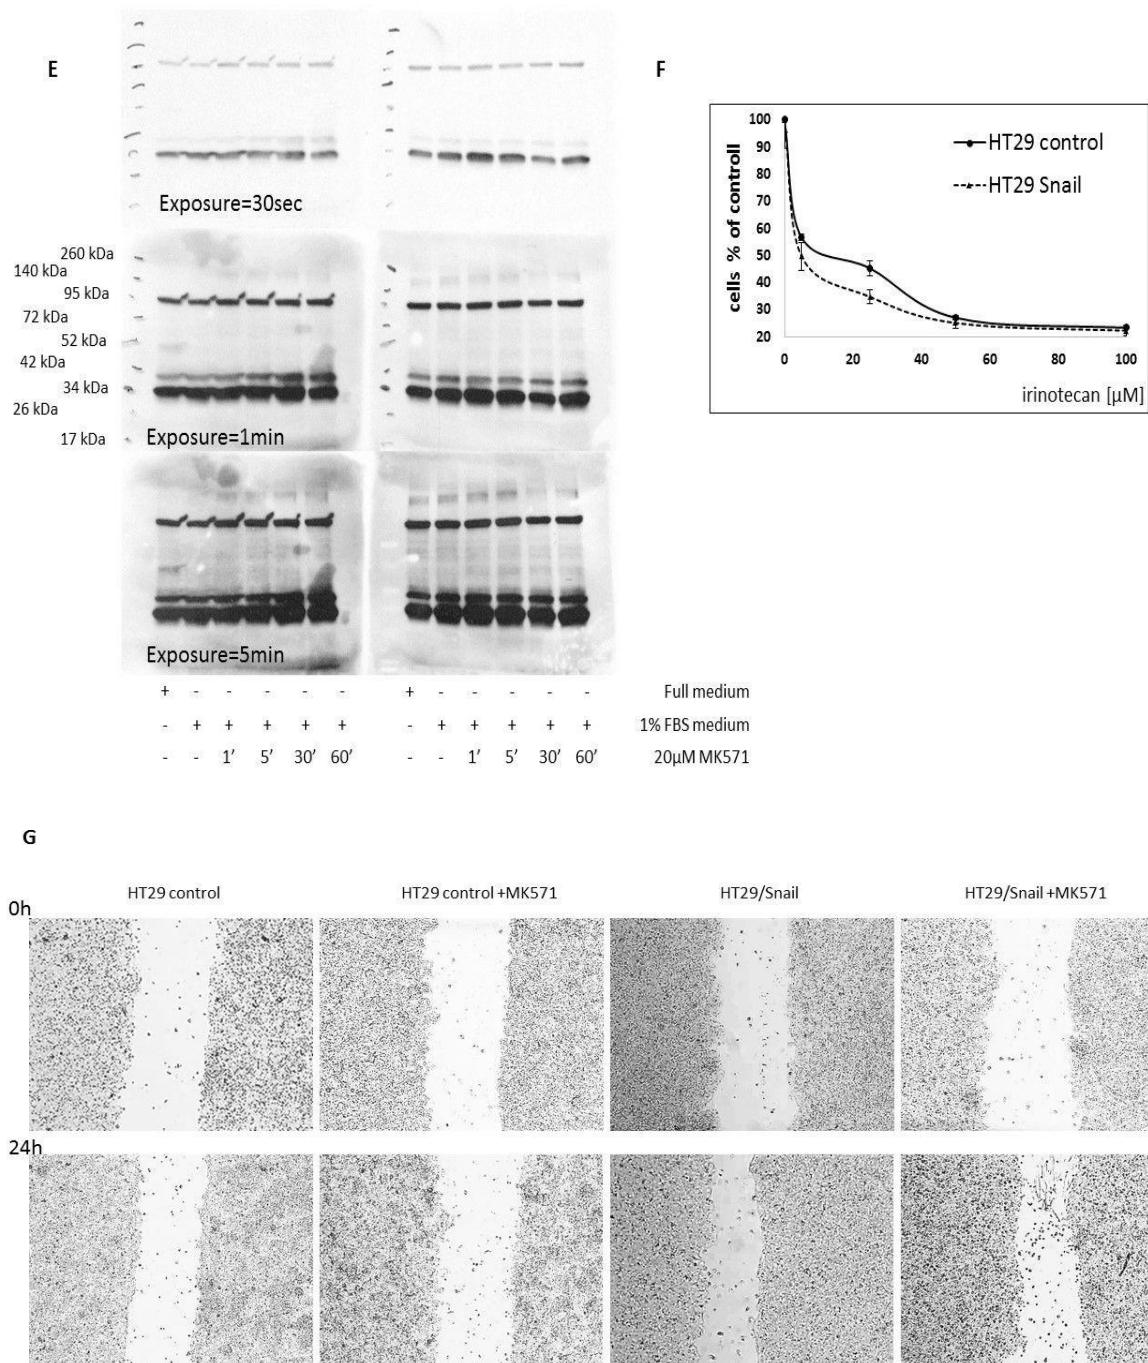

**Figure S1. A)** Comparison of Pearson's and Spearman's correlation values **B)** Relative densitometry quantification of ABCC4/ABCG2 protein expression level in HT29 cells (left panel). Relative densitometry quantification of ABCC4 protein expression in membrane fraction in HT29 cells (right panel). Expression of respective proteins in HT29 control cells were set as control 100%. **C)** Relative densitometry quantification of ABCC4 protein expression level in various CRC cells lines. CCD841CoN was set as control 100%. **D)** Relative densitometry quantification of ABCC4 abundance in HT29 cells EVs. Expression of ABCC4 in EVs from HT29 control cells were set as control 100%; statistic significance calculated using T-test \* $P < 0.05$ ; \*\* $P < 0.005$ ; \*\*\* $P < 0.001$ . **E)** Representative films of phosphorylation profile of PKA substrates after ABCC4 inhibition in HT29/Snail (left panel) and control HT29 cells (right panel) from 3 different exposure time. **F)** Irinotecan cytotoxicity (IC25 and IC50) for HT29/Snail and control HT29 cells. **G)** representative images of wound healing of HT-29 control w/wo MK571 and HT-29/Snail w/wo MK571.

Figure S2

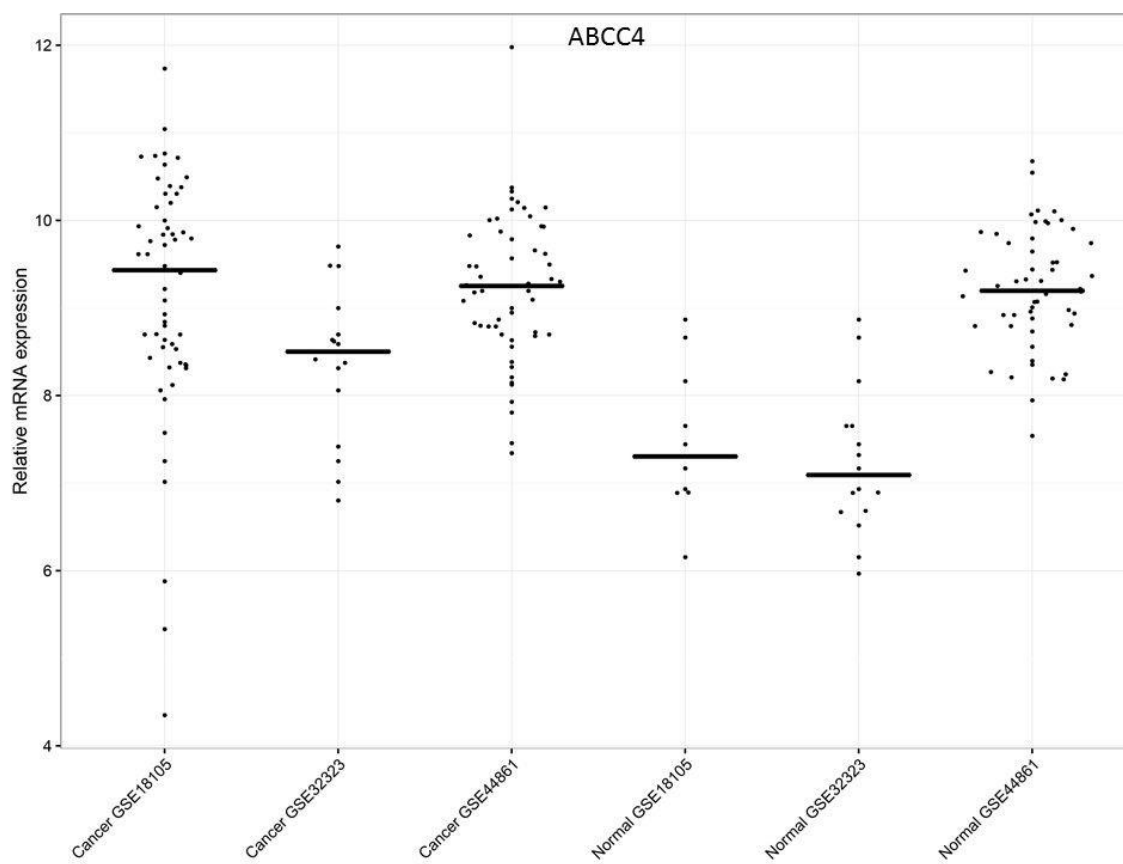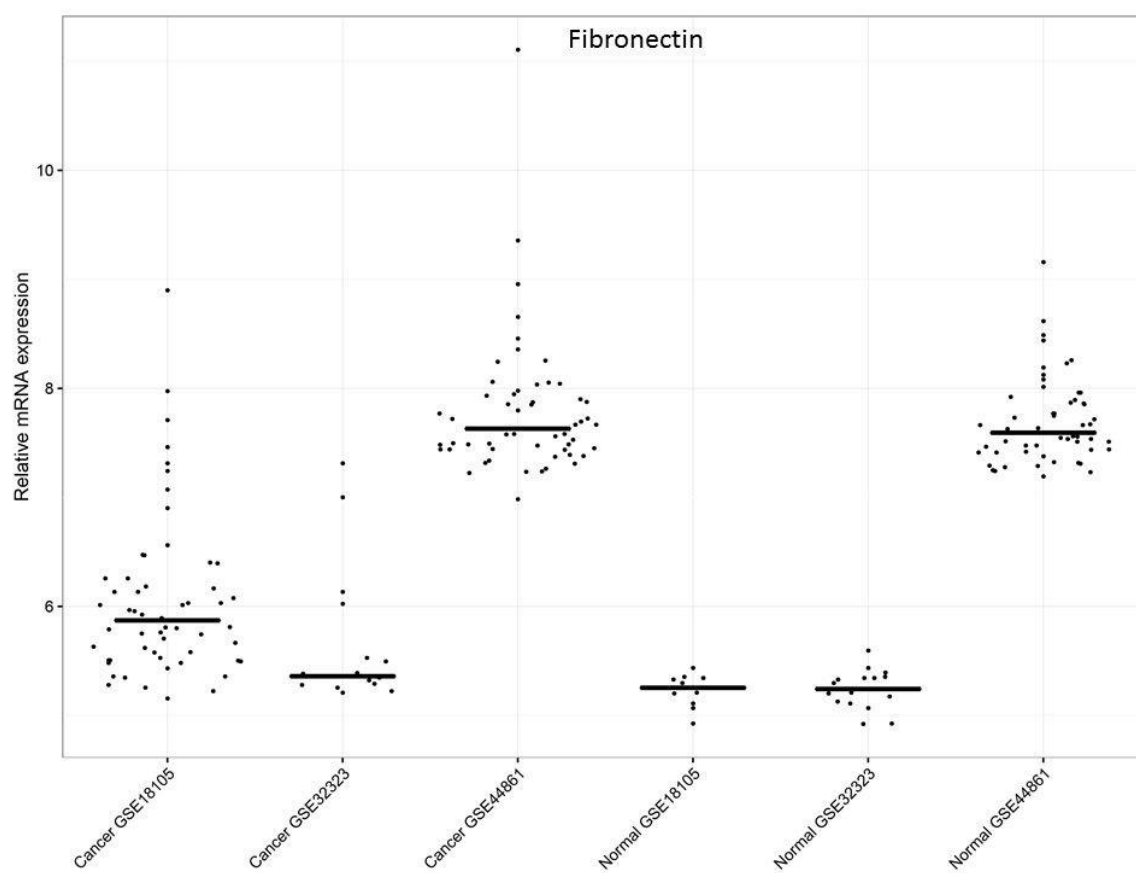

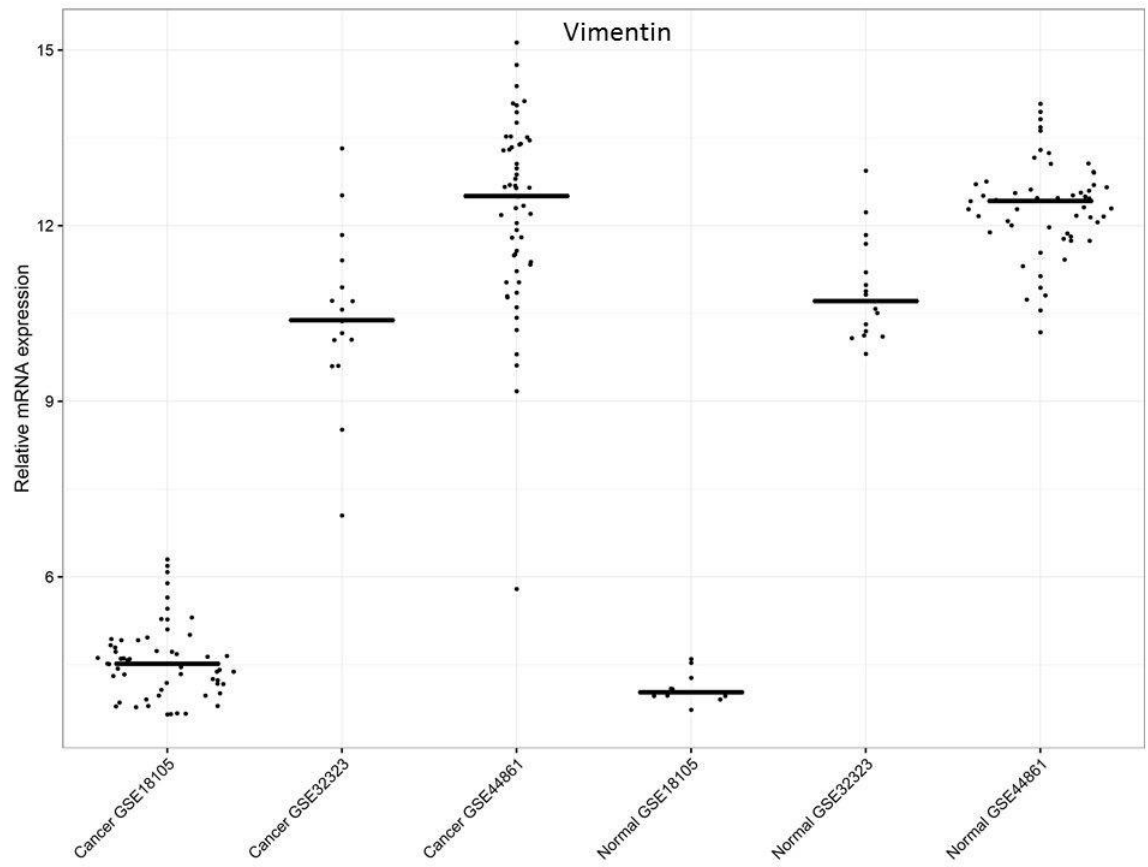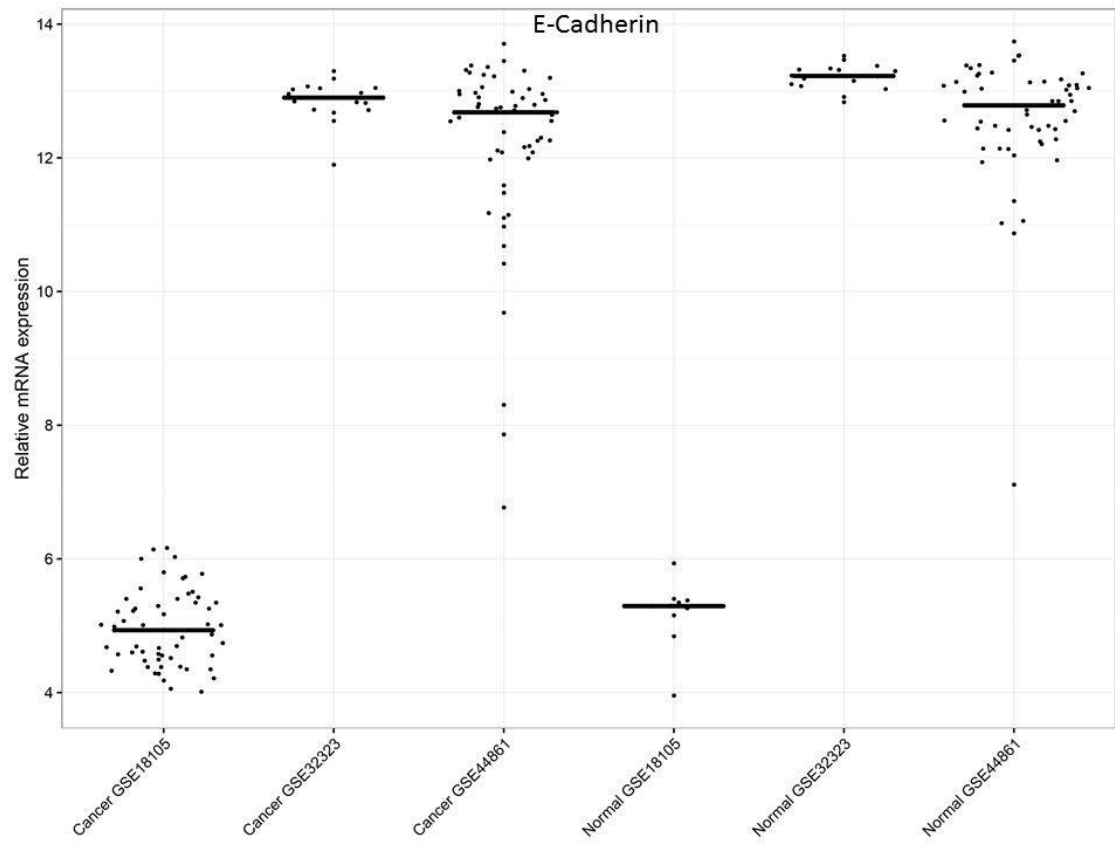

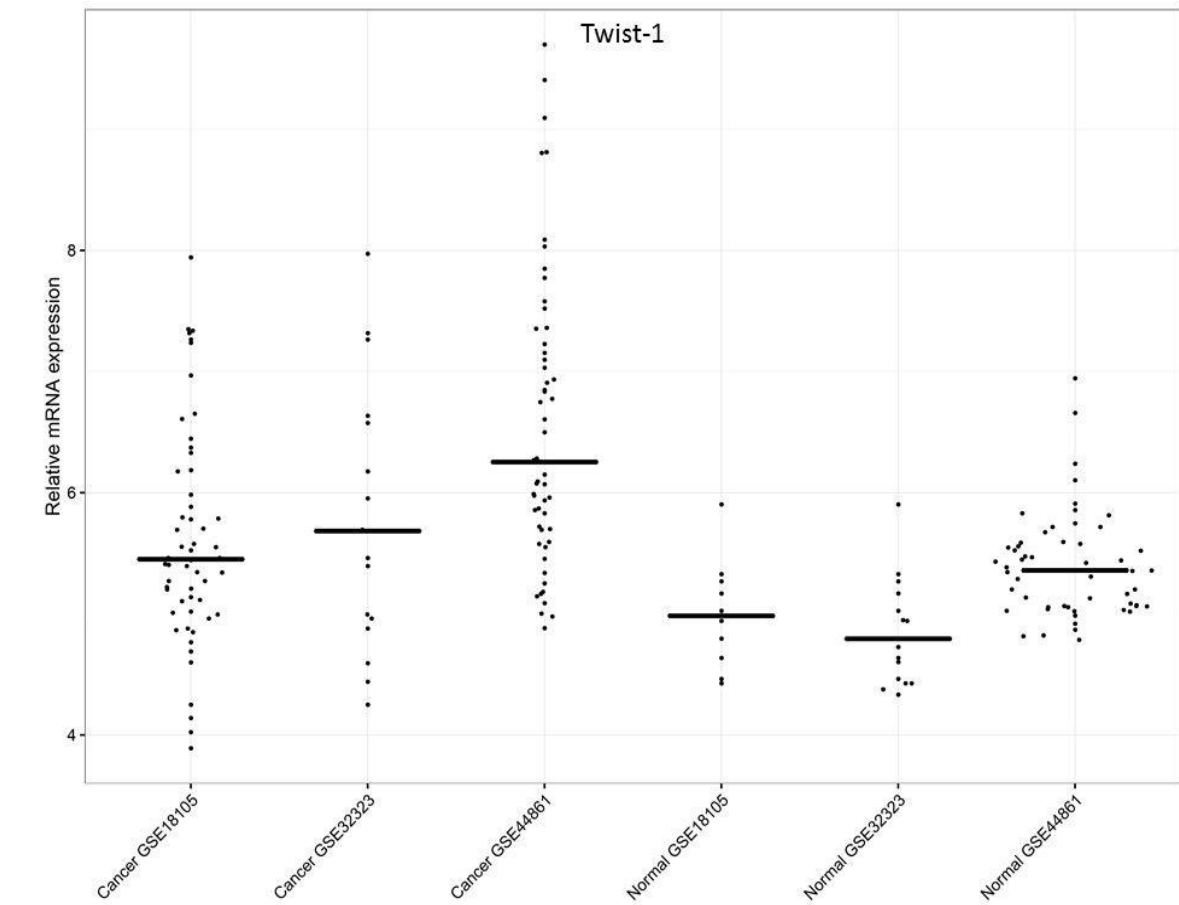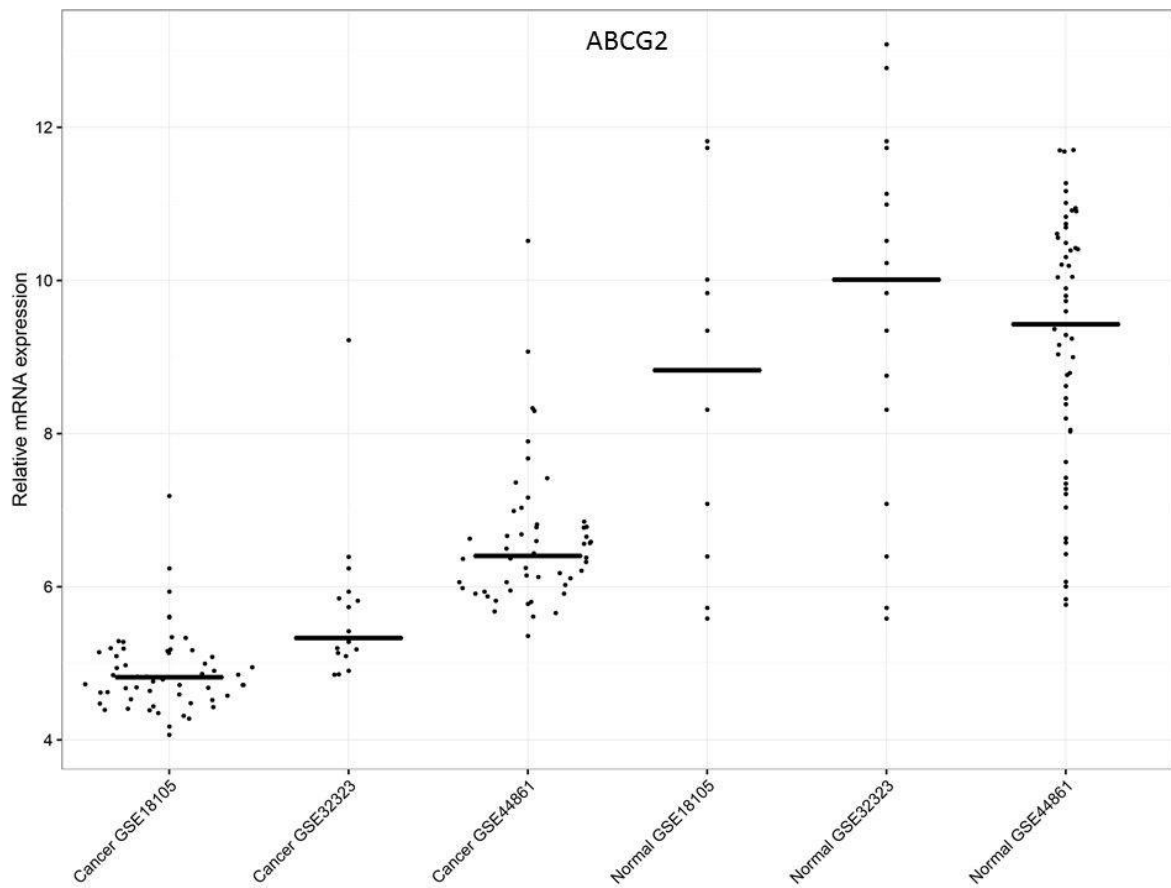

**Figure S2.** Data density distribution produced with SinaPlot tools.  
<https://www.tandfonline.com/doi/abs/10.1080/10618600.2017.1366914>.

Original Western Blots:

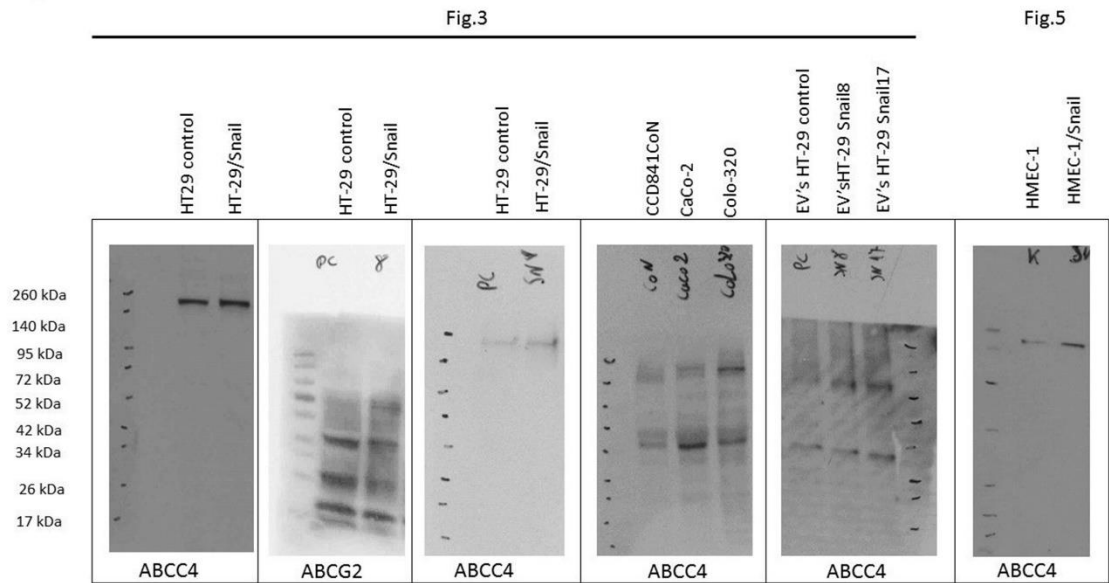

**Figure S3.** Original Western Blots.
